# Supplementary material for: Identification of Species of Nontuberculous Mycobacteria Clinical Isolates from 8 Provinces of China
Source: Biomed Res Int. 2016 Nov 2;2016:2153910. doi: 10.1155/2016/2153910 (PMC5110891; doi:10.1155/2016/2153910)
Supplement: Supplementary file 1 — In the Supplementary Material, we supplied the detail Genbank accession number of all the sequences which were used to identify the genotype and to construct the N-J phylogeny trees of the sample isolates. [file 2153910.f1.xlsx]

## Sheet: accession numbers
hsp65			rpoB			ITS
Strain ID	accession numbers		Strain ID	accession numbers		Strain ID	accession numbers
AH11018	KF432430		FJ09027	KF432417		FJ12045	KF432817
AH11245	KF432431		FJ10006	KF432418		FJ12103	KF432818
AH11270	KF432432		FJ12063	KF432419		FJ12109	KF432819
AH11271	KF432433		GS10015	KF432420		FJ12138	KF432820
AH11374	KF432434		GS10025	KF432421		FJ12145	KF432821
AH11376	KF432435		GS10028	KF432422		FJ12155	KF432822
FJ05241	KF432436		GS10034	KF432423		JX09341	KF432823
FJ05242	KF432437		GS10037	KF432424
FJ05243	KF432438		GS10038	KF432425
FJ05511	KF432439		GS10040	KF432426
FJ05512	KF432440		GS10041	KF432427
FJ05513	KF432441		GS10042	KF432428
FJ05515	KF432442		GS10047	KF432429
FJ05516	KF432443
FJ05517	KF432444
FJ05520	KF432445
FJ05524	KF432446
FJ05534	KF432447
FJ05535	KF432448
FJ05539	KF432449
FJ05541	KF432450
FJ05543	KF432451
FJ05547	KF432452
FJ05549	KF432453
FJ06106	KF432454
FJ06107	KF432455
FJ06111	KF432456
FJ06112	KF432457
FJ06114	KF432458
FJ06115	KF432459
FJ06120	KF432460
FJ06122	KF432461
FJ06126	KF432462
FJ06128	KF432463
FJ06130	KF432464
FJ06131	KF432465
FJ06132	KF432466
FJ06133	KF432467
FJ06136	KF432468
FJ06138	KF432469
FJ06142	KF432470
FJ06145	KF432471
FJ06147	KF432472
FJ06149	KF432473
FJ06152	KF432474
FJ06155	KF432475
FJ06158	KF432476
FJ09005	KF432477
FJ09014	KF432478
FJ09022	KF432479
FJ09023	KF432480
FJ09025	KF432481
FJ09030	KF432482
FJ09037	KF432483
FJ09039	KF432484
FJ09041	KF432485
FJ09042	KF432486
FJ09043	KF432487
FJ09044	KF432488
FJ09046	KF432489
FJ09049	KF432490
FJ09050	KF432491
FJ09052	KF432492
FJ09054	KF432493
FJ09057	KF432494
FJ09064	KF432495
FJ09068	KF432496
FJ09069	KF432497
FJ09070	KF432498
FJ09073	KF432499
FJ09079	KF432500
FJ09080	KF432501
FJ09081	KF432502
FJ09082	KF432503
FJ09083	KF432504
FJ09086	KF432505
FJ09087	KF432506
FJ09088	KF432507
FJ10024	KF432508
FJ10025	KF432509
FJ10026	KF432510
FJ10027	KF432511
FJ10028	KF432512
FJ10030	KF432513
FJ10031	KF432514
FJ10032	KF432515
FJ10033	KF432516
FJ10034	KF432517
FJ10035	KF432518
FJ10036	KF432519
FJ10037	KF432520
FJ10038	KF432521
FJ10039	KF432522
FJ10041	KF432523
FJ10044	KF432524
FJ10045	KF432525
FJ10046	KF432526
FJ10047	KF432527
FJ10048	KF432528
FJ10050	KF432529
FJ10051	KF432530
FJ10055	KF432531
FJ10056	KF432532
FJ10057	KF432533
FJ10058	KF432534
FJ10059	KF432535
FJ10060	KF432536
FJ10062	KF432537
FJ10065	KF432538
FJ10066	KF432539
FJ10067	KF432540
FJ10068	KF432541
FJ10069	KF432542
FJ10070	KF432543
FJ10071	KF432544
FJ10072	KF432545
FJ10073	KF432546
FJ10074	KF432547
FJ10075	KF432548
FJ10076	KF432549
FJ10077	KF432550
FJ10078	KF432551
FJ10079	KF432552
FJ10080	KF432553
FJ10081	KF432554
FJ10082	KF432555
FJ10083	KF432556
FJ10084	KF432557
FJ10085	KF432558
FJ10088	KF432559
FJ10089	KF432560
FJ10090	KF432561
FJ10091	KF432562
FJ10092	KF432563
FJ10093	KF432564
FJ10094	KF432565
FJ10095	KF432566
FJ10096	KF432567
FJ10099	KF432568
FJ10101	KF432569
FJ10102	KF432570
FJ10103	KF432571
FJ10107	KF432572
FJ10108	KF432573
FJ10109	KF432574
FJ10110	KF432575
FJ10111	KF432576
FJ10113	KF432577
FJ10115	KF432578
FJ10116	KF432579
FJ10117	KF432580
FJ10118	KF432581
FJ10119	KF432582
FJ10121	KF432583
FJ10122	KF432584
FJ10123	KF432585
FJ10124	KF432586
FJ10126	KF432587
FJ10127	KF432588
FJ10128	KF432589
FJ10129	KF432590
FJ10130	KF432591
FJ10131	KF432592
FJ10133	KF432593
FJ10135	KF432594
FJ10136	KF432595
FJ10137	KF432596
FJ10138	KF432597
FJ10140	KF432598
FJ10141	KF432599
FJ10142	KF432600
FJ10143	KF432601
FJ10144	KF432602
FJ10146	KF432603
FJ10147	KF432604
FJ10148	KF432605
FJ10149	KF432606
FJ10151	KF432607
FJ10152	KF432608
FJ10153	KF432609
FJ10154	KF432610
FJ10155	KF432611
FJ10156	KF432612
FJ10157	KF432613
FJ12002	KF432614
FJ12003	KF432615
FJ12004	KF432616
FJ12005	KF432617
FJ12006	KF432618
FJ12007	KF432619
FJ12008	KF432620
FJ12010	KF432621
FJ12011	KF432622
FJ12012	KF432623
FJ12015	KF432624
FJ12016	KF432625
FJ12017	KF432626
FJ12018	KF432627
FJ12019	KF432628
FJ12020	KF432629
FJ12021	KF432630
FJ12022	KF432631
FJ12025	KF432632
FJ12026	KF432633
FJ12028	KF432634
FJ12029	KF432635
FJ12030	KF432636
FJ12031	KF432637
FJ12032	KF432638
FJ12034	KF432639
FJ12035	KF432640
FJ12036	KF432641
FJ12037	KF432642
FJ12038	KF432643
FJ12039	KF432644
FJ12040	KF432645
FJ12041	KF432646
FJ12042	KF432647
FJ12043	KF432648
FJ12044	KF432649
FJ12046	KF432650
FJ12047	KF432651
FJ12048	KF432652
FJ12049	KF432653
FJ12050	KF432654
FJ12052	KF432655
FJ12054	KF432656
FJ12055	KF432657
FJ12056	KF432658
FJ12060	KF432659
FJ12061	KF432660
FJ12062	KF432661
FJ12065	KF432662
FJ12066	KF432663
FJ12067	KF432664
FJ12069	KF432665
FJ12070	KF432666
FJ12071	KF432667
FJ12072	KF432668
FJ12073	KF432669
FJ12074	KF432670
FJ12075	KF432671
FJ12076	KF432672
FJ12077	KF432673
FJ12078	KF432674
FJ12079	KF432675
FJ12080	KF432676
FJ12081	KF432677
FJ12083	KF432678
FJ12085	KF432679
FJ12086	KF432680
FJ12087	KF432681
FJ12088	KF432682
FJ12089	KF432683
FJ12091	KF432684
FJ12092	KF432685
FJ12094	KF432686
FJ12095	KF432687
FJ12096	KF432688
FJ12097	KF432689
FJ12098	KF432690
FJ12099	KF432691
FJ12100	KF432692
FJ12101	KF432693
FJ12102	KF432694
FJ12104	KF432695
FJ12105	KF432696
FJ12106	KF432697
FJ12107	KF432698
FJ12108	KF432699
FJ12110	KF432700
FJ12111	KF432701
FJ12112	KF432702
FJ12114	KF432703
FJ12115	KF432704
FJ12116	KF432705
FJ12117	KF432706
FJ12118	KF432707
FJ12119	KF432708
FJ12121	KF432709
FJ12122	KF432710
FJ12123	KF432711
FJ12124	KF432712
FJ12125	KF432713
FJ12126	KF432714
FJ12127	KF432715
FJ12128	KF432716
FJ12129	KF432717
FJ12131	KF432718
FJ12132	KF432719
FJ12133	KF432720
FJ12136	KF432721
FJ12137	KF432722
FJ12139	KF432723
FJ12140	KF432724
FJ12141	KF432725
FJ12142	KF432726
FJ12144	KF432727
FJ12146	KF432728
FJ12147	KF432729
FJ12149	KF432730
FJ12150	KF432731
FJ12151	KF432732
FJ12152	KF432733
FJ12153	KF432734
FJ12154	KF432735
FJ12156	KF432736
FJ12157	KF432737
FJ12158	KF432738
FJ12159	KF432739
FJ12160	KF432740
GS10003	KF432741
GS10004	KF432742
GS10007	KF432743
GS10008	KF432744
GS10011	KF432745
GS10018	KF432746
GS10019	KF432747
GS10020	KF432748
GS10021	KF432749
GS10022	KF432750
GS10023	KF432751
GS10024	KF432752
GS10026	KF432753
GS10030	KF432754
GS10033	KF432755
GS10045	KF432756
GS10050	KF432757
GS10051	KF432758
GS10054	KF432759
GS10055	KF432760
HN11051	KF432761
HN11052	KF432762
HN11053	KF432763
HN11054	KF432764
HN11055	KF432765
HN11056	KF432766
HN11058	KF432767
HN11059	KF432768
HN11060	KF432769
HN11061	KF432770
HN11062	KF432771
HN11063	KF432772
HN11064	KF432773
HN11065	KF432774
HN11066	KF432775
HN11067	KF432776
HN11068	KF432777
HN11069	KF432778
HN11071	KF432779
HN11072	KF432780
HN11073	KF432781
HN11074	KF432782
HN11075	KF432783
HN11077	KF432784
HN11078	KF432785
HN11079	KF432786
HN11080	KF432787
HN11081	KF432788
HN11082	KF432789
HN11083	KF432790
HN11084	KF432791
HN11085	KF432792
HN11086	KF432793
HN11087	KF432794
HN11088	KF432795
HN11089	KF432796
HN11093	KF432797
HN11094	KF432798
HN11096	KF432799
HN11097	KF432800
HN11099	KF432801
HN11104	KF432802
JX09003	KF432803
JX09333	KF432804
JX09387	KF432805
NM11089	KF432806
NM11109	KF432807
NM11208	KF432808
SC11084	KF432809
SC11091	KF432810
XJ11001	KF432811
XJ11002	KF432812
XJ11004	KF432813
XJ11005	KF432814
XJ11068	KF432815
XJ11069	KF432816
